# Supplementary material
Source: publisher figshare collection journal article supplement (https://tandf.figshare.com/ndownloader/files/13297628)
Supplement: Supplementary file 1 [file 13297628]

**Supp Table 1** Scoring criteria for the developmental stage of human figure drawings

| **STAGE** | **CRITERIA** |
| --- | --- |
| **SCRIBBLE**  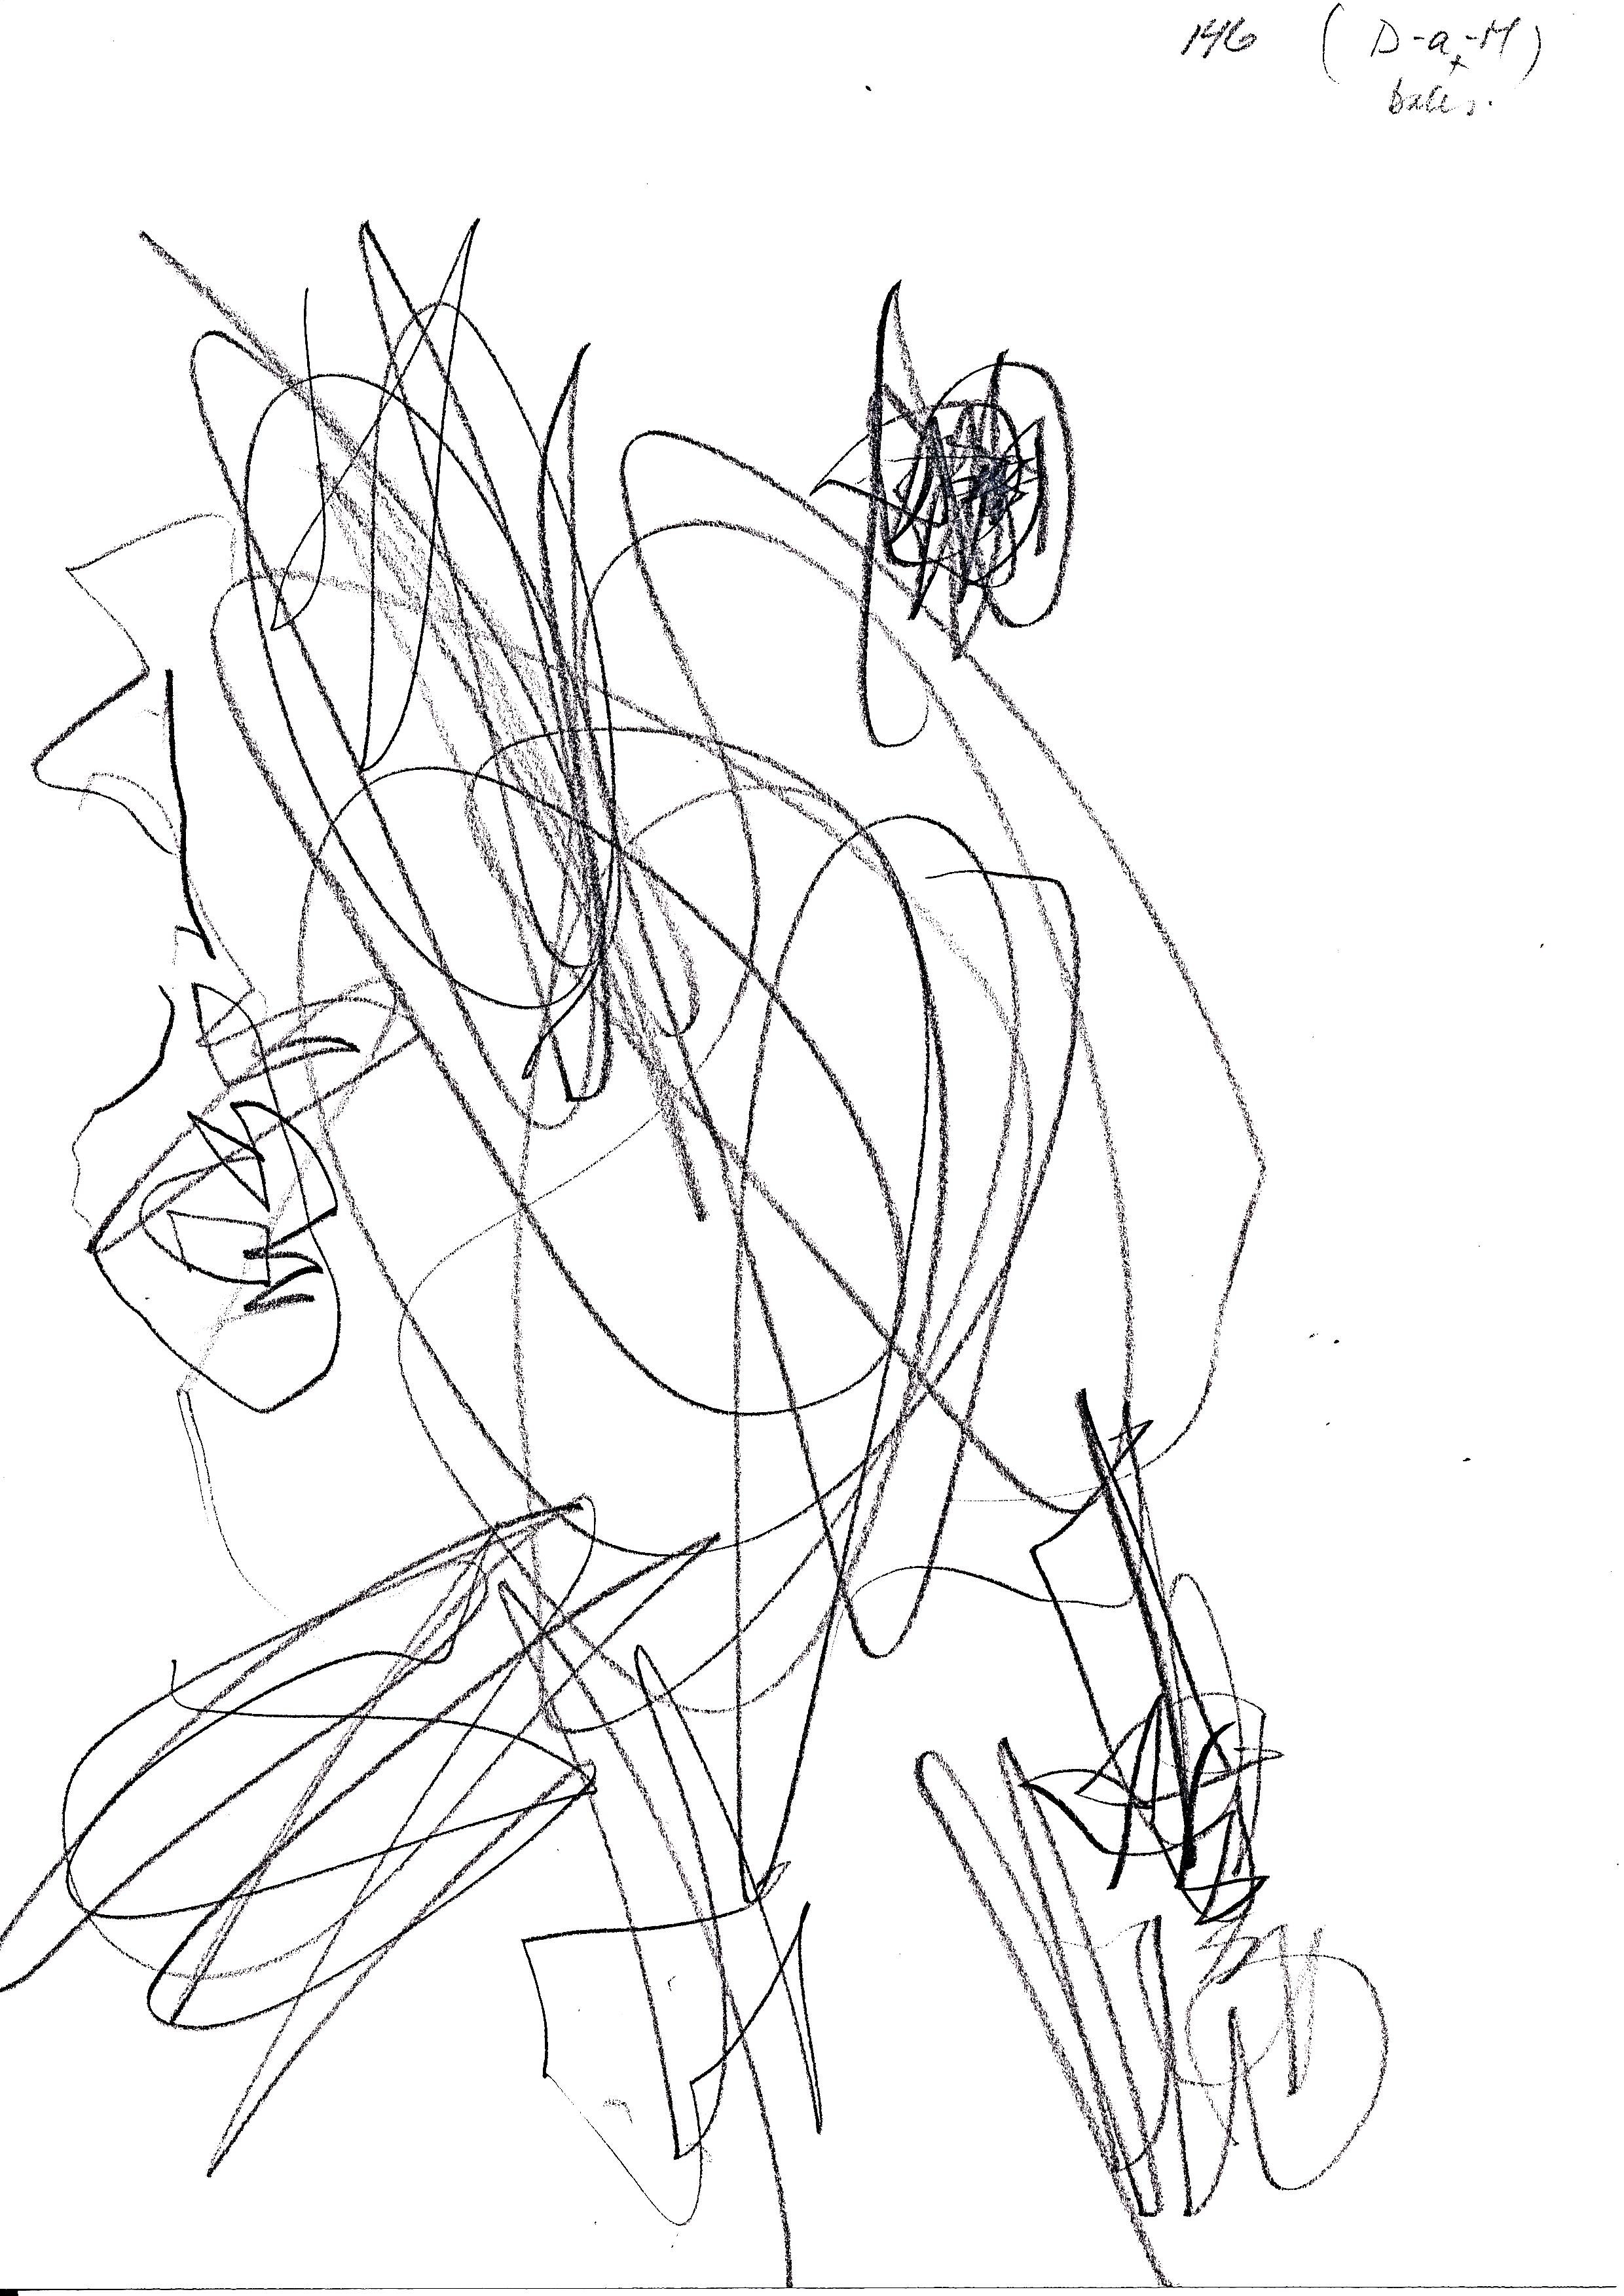 | - Nothing recognizable - Continuous circular lines - Child cannot describe what is drawn |
| **PRE-TADPOLE**  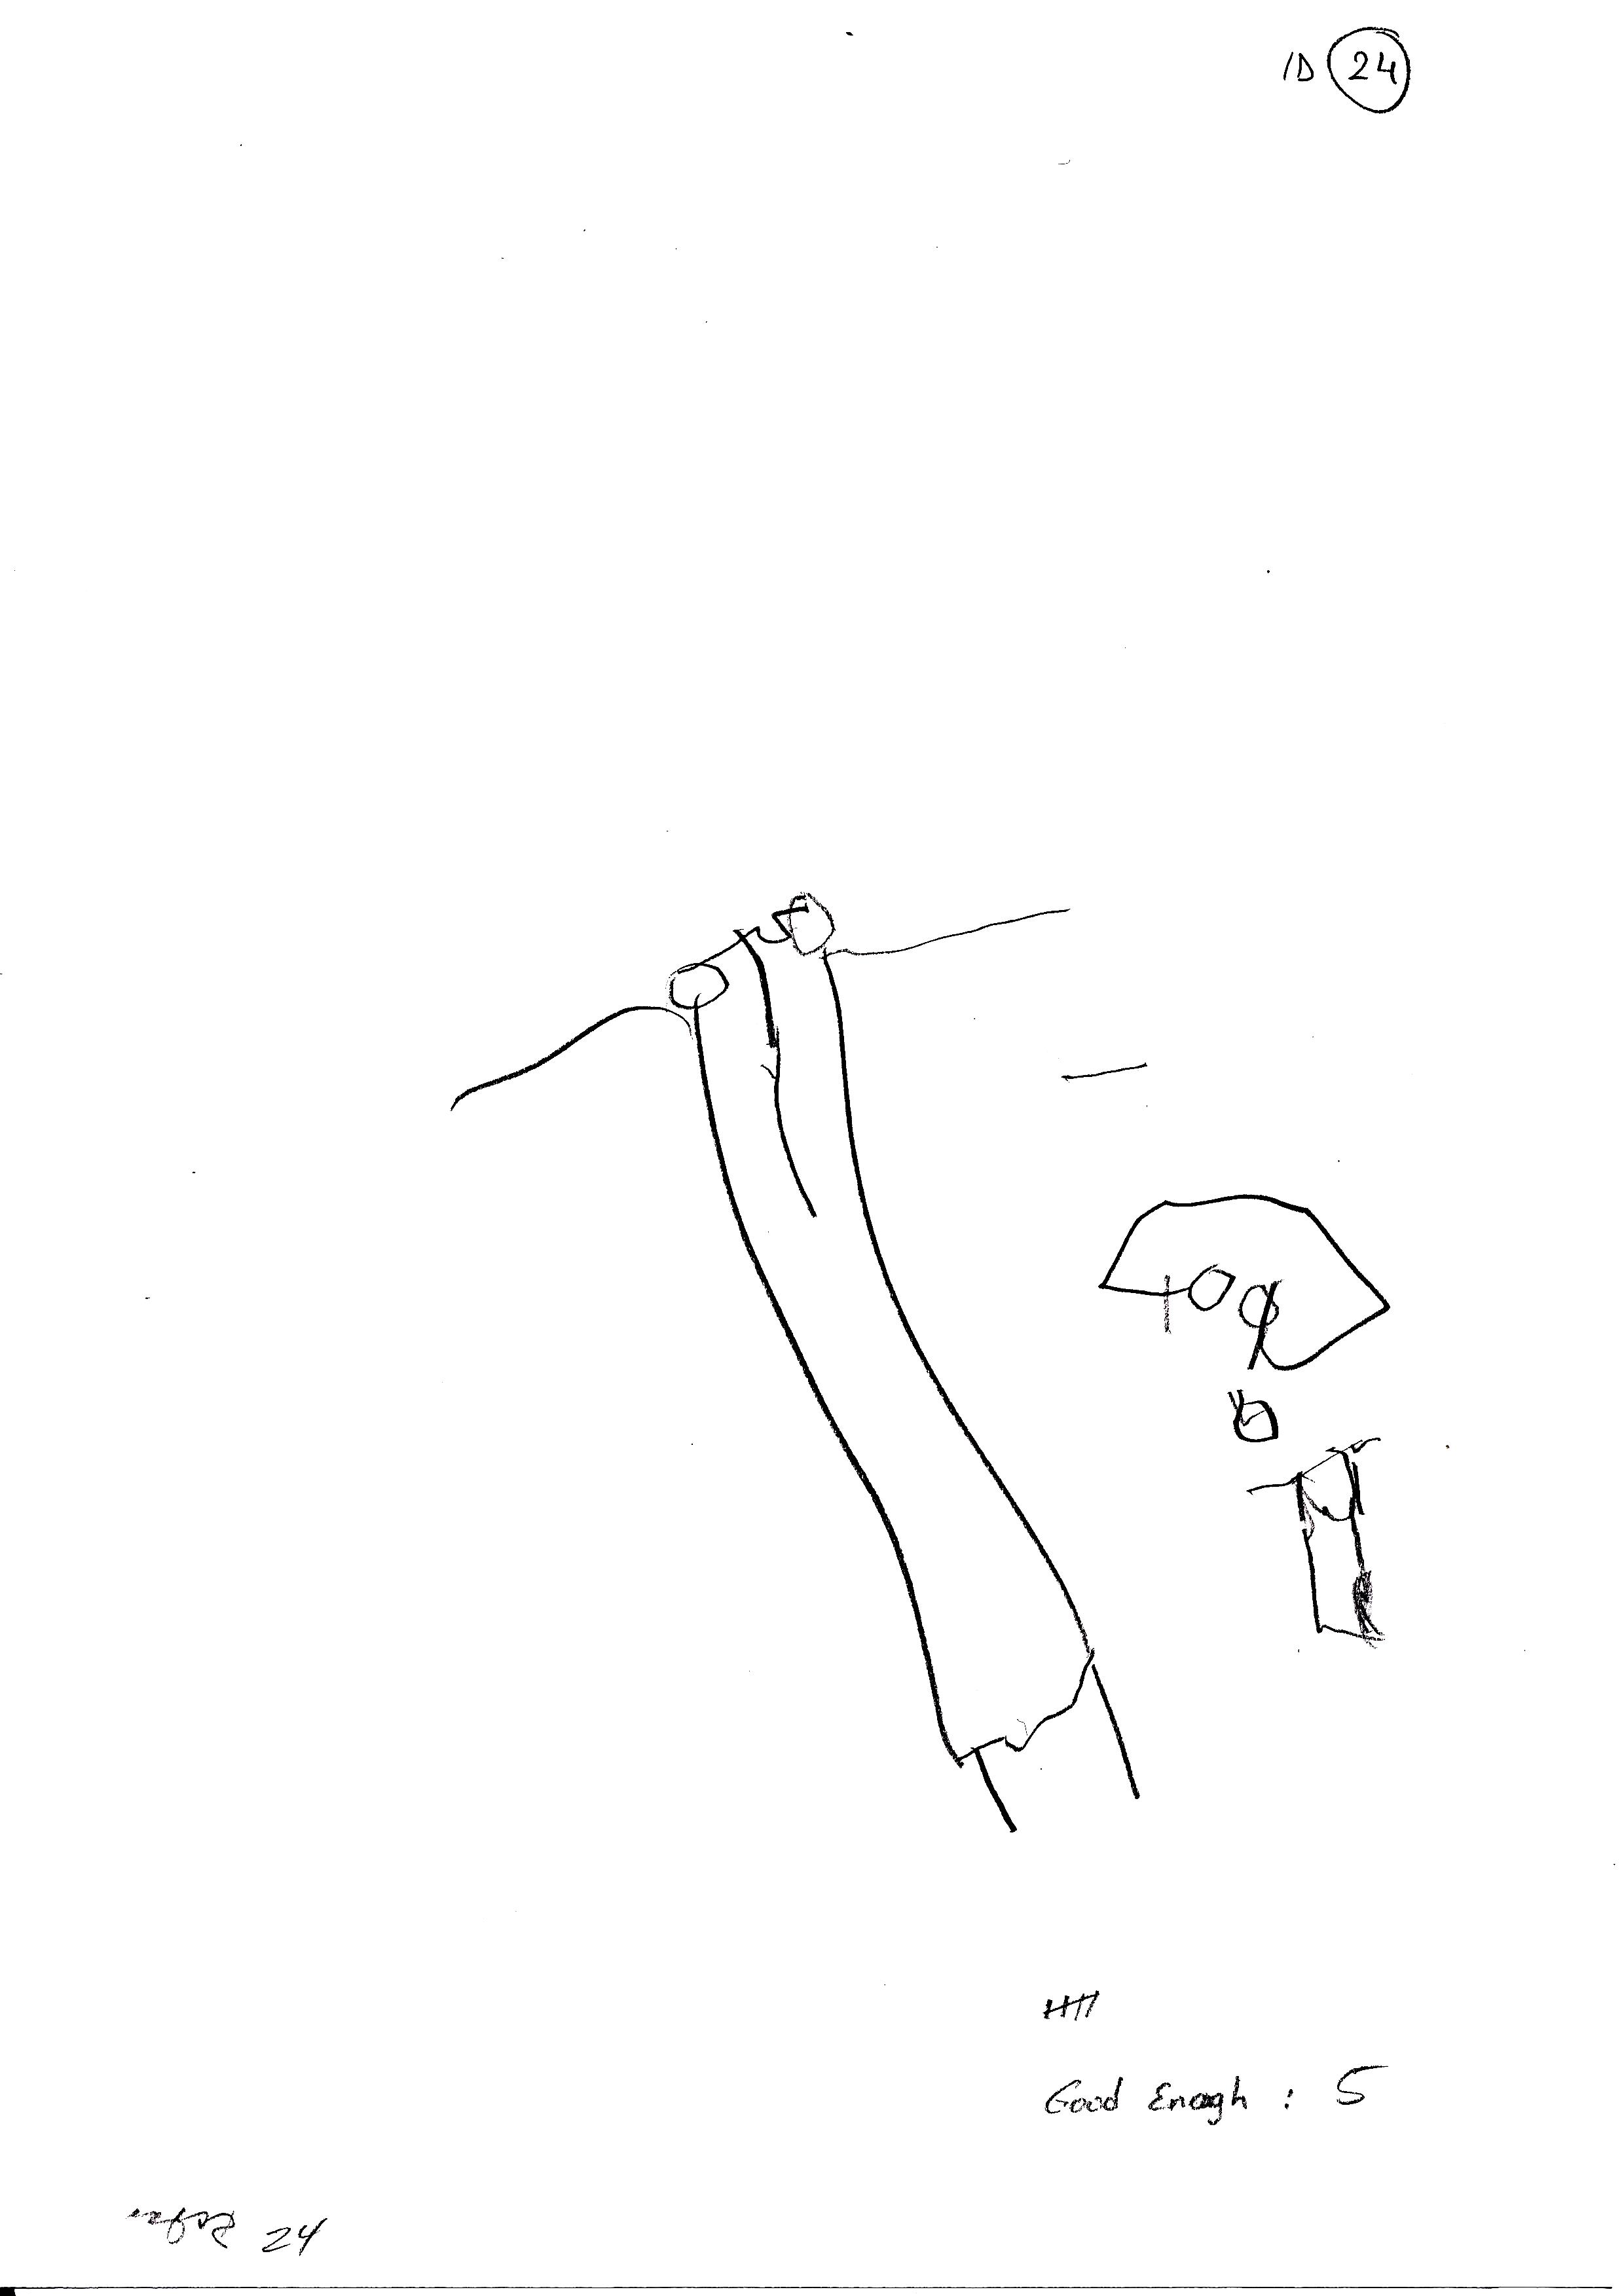 | - Child is drawing but cannot identify the picture - Separation of different scribbles - Shows face only - Face and feet consist of one line |
| **TADPOLE**  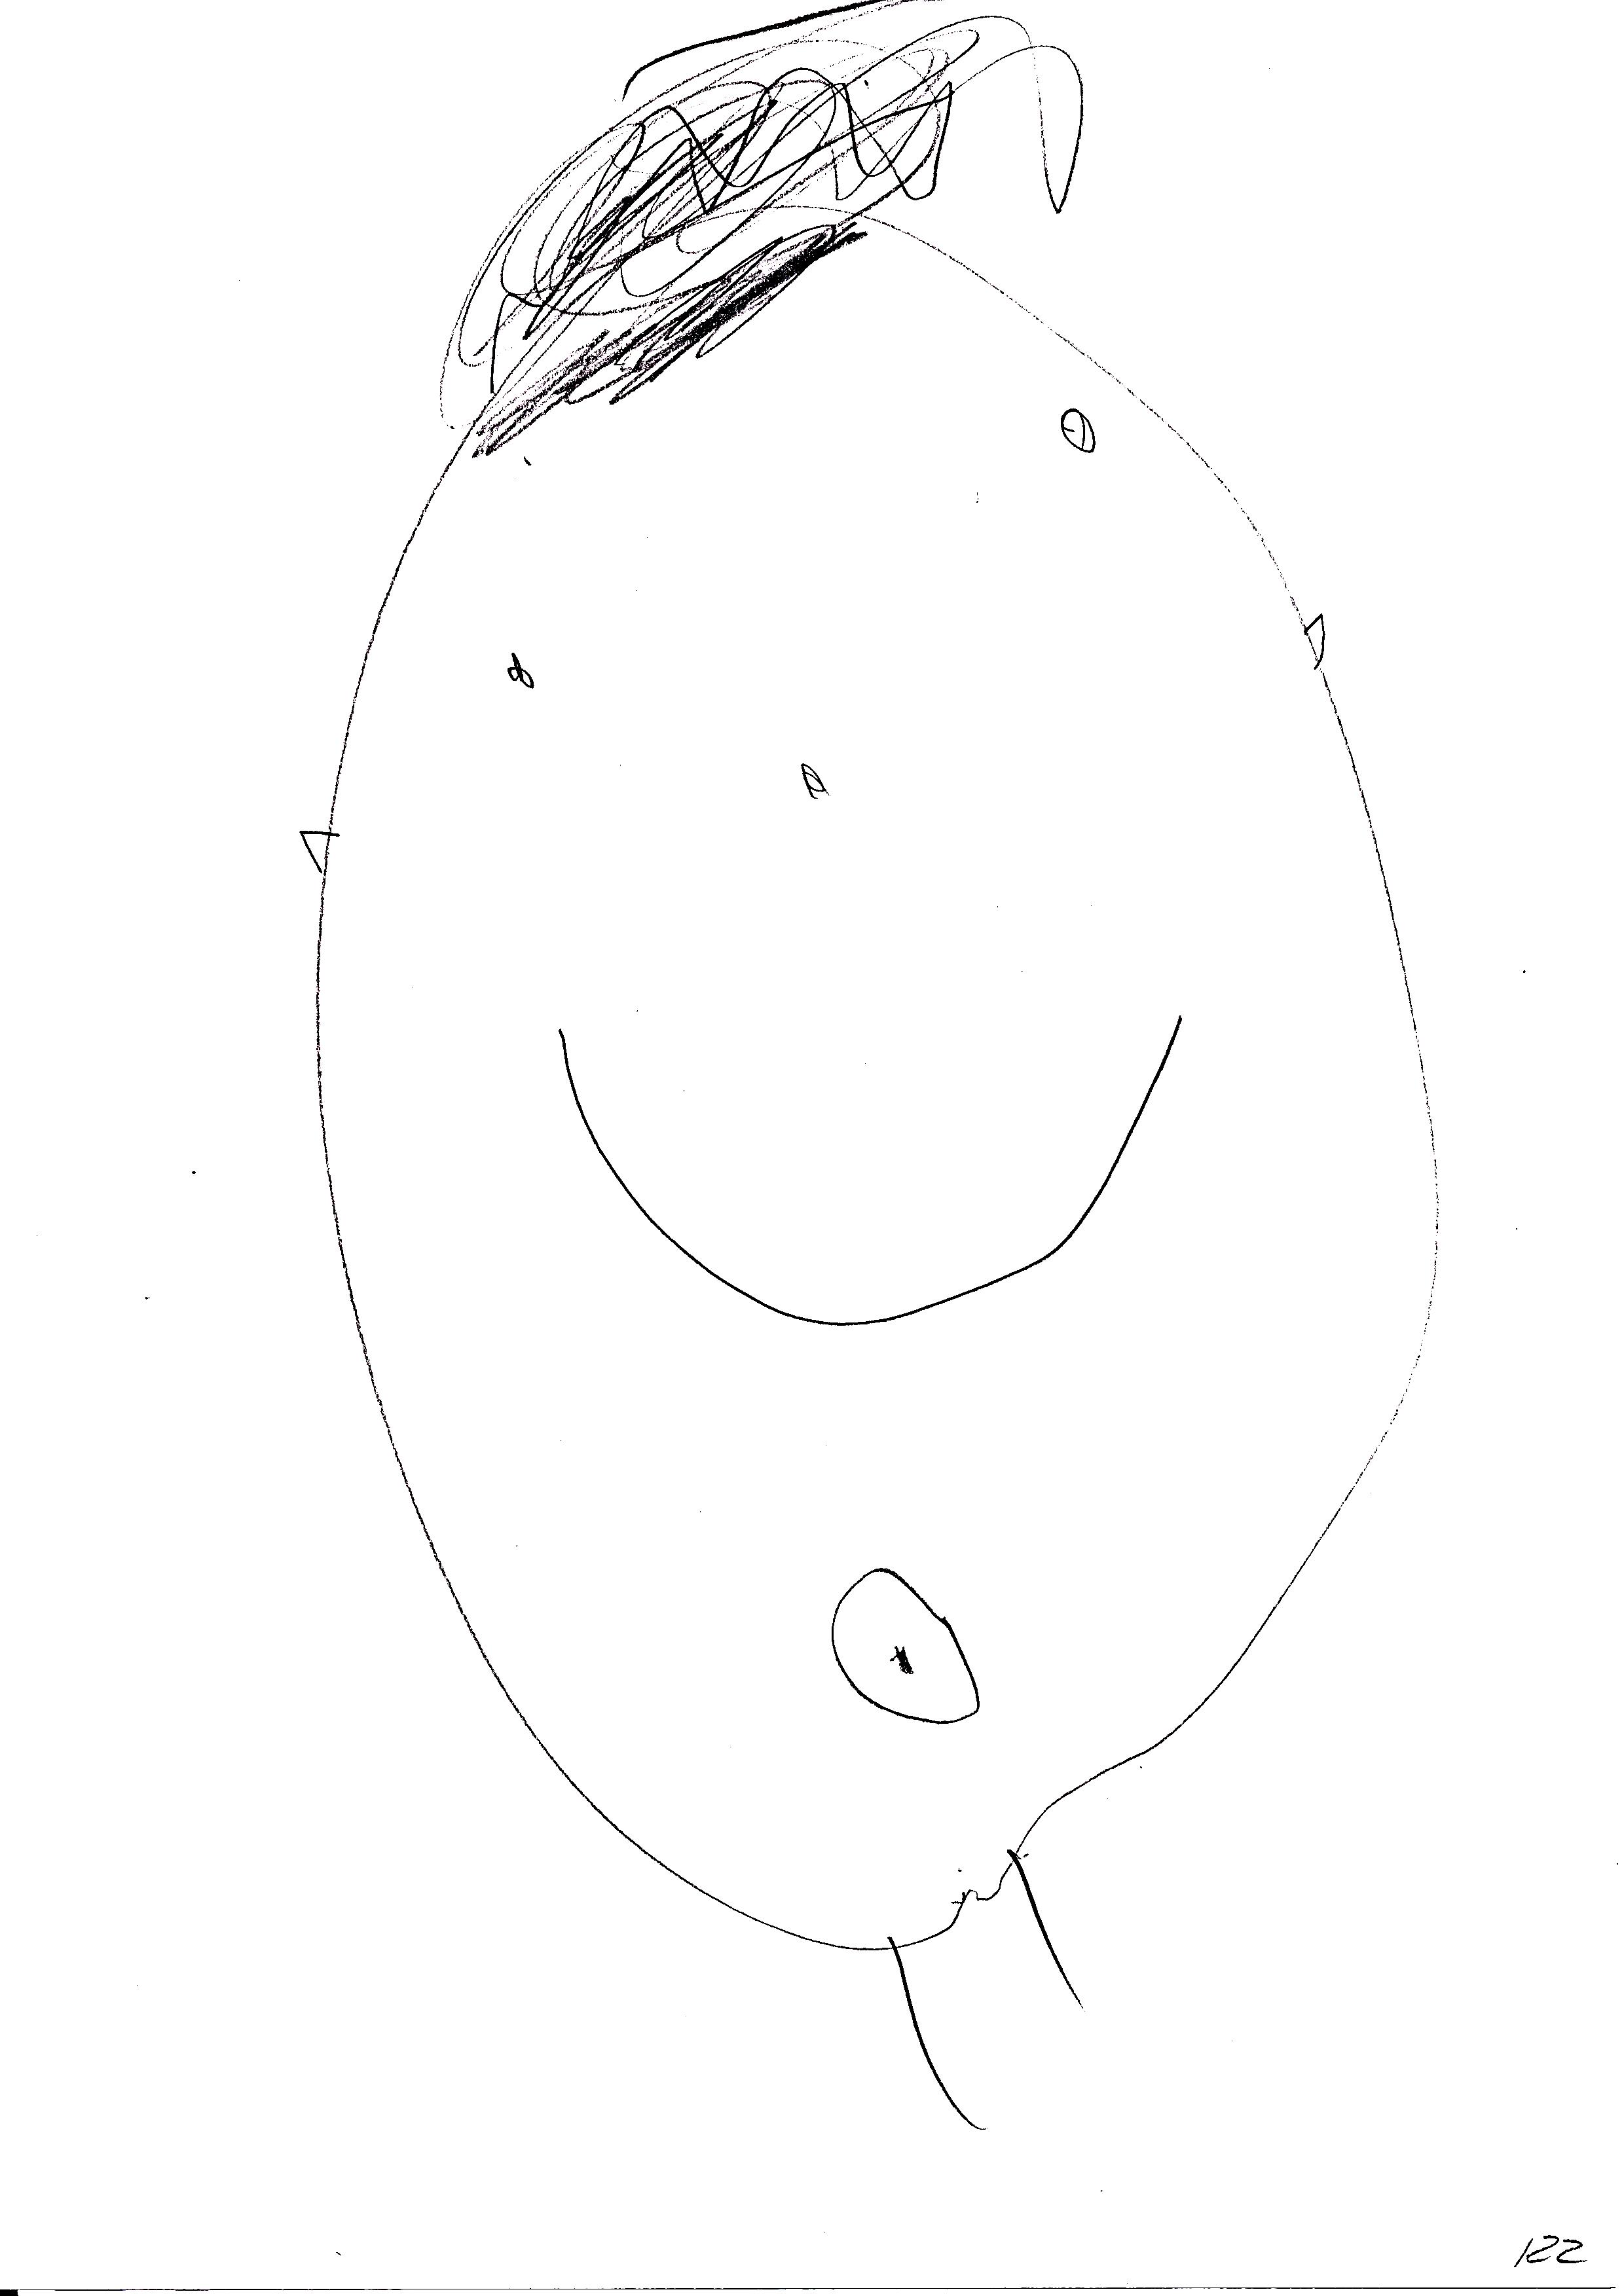 | - Head, arms, and/or legs present - Arms/legs protrude from the head - No head/body closure, but face, arms, and legs are present - Sun-like with arms and legs |
| **TRANSITIONAL**  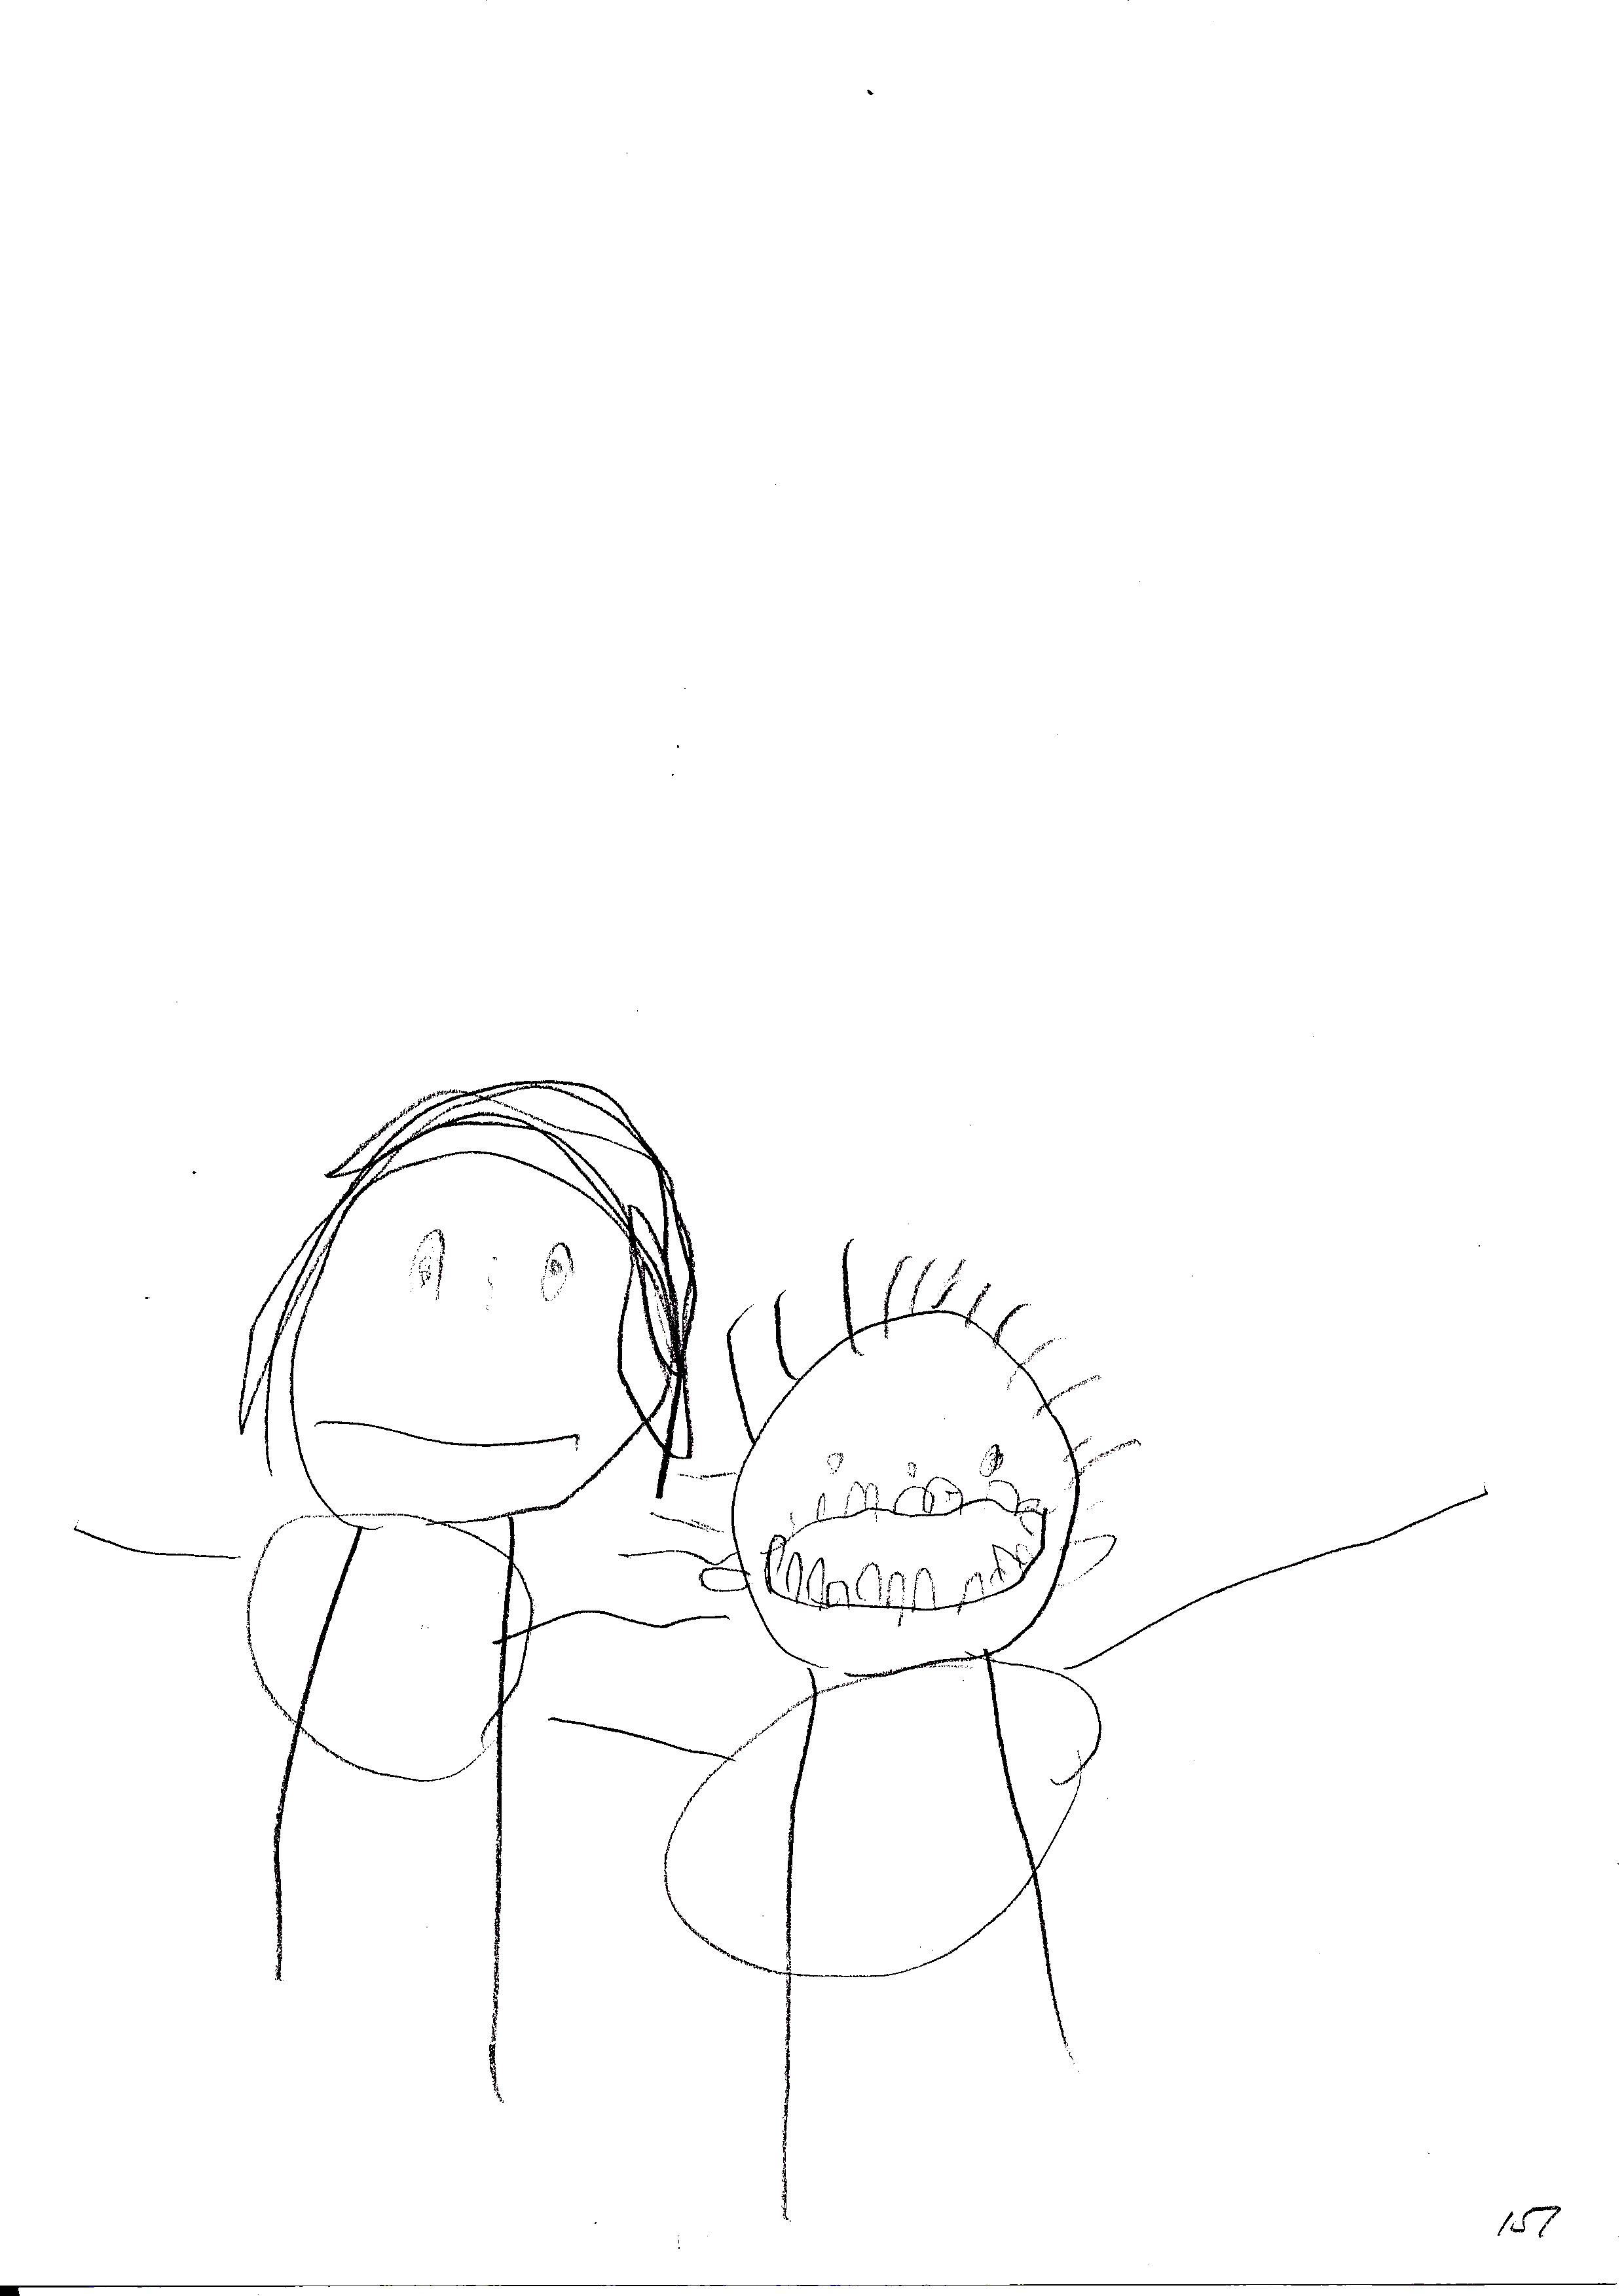 | - Arms/legs are not protruding from the head - A line is used for the body - Arms are connected to legs or body - No separation of head and body - Stick-man picture: sticks are used for all body parts except head - Body outline but no face - Only head and body; no arms/legs - No neck - Body outline is distorted; no spatial order |
| **CONVENTIONAL-I**  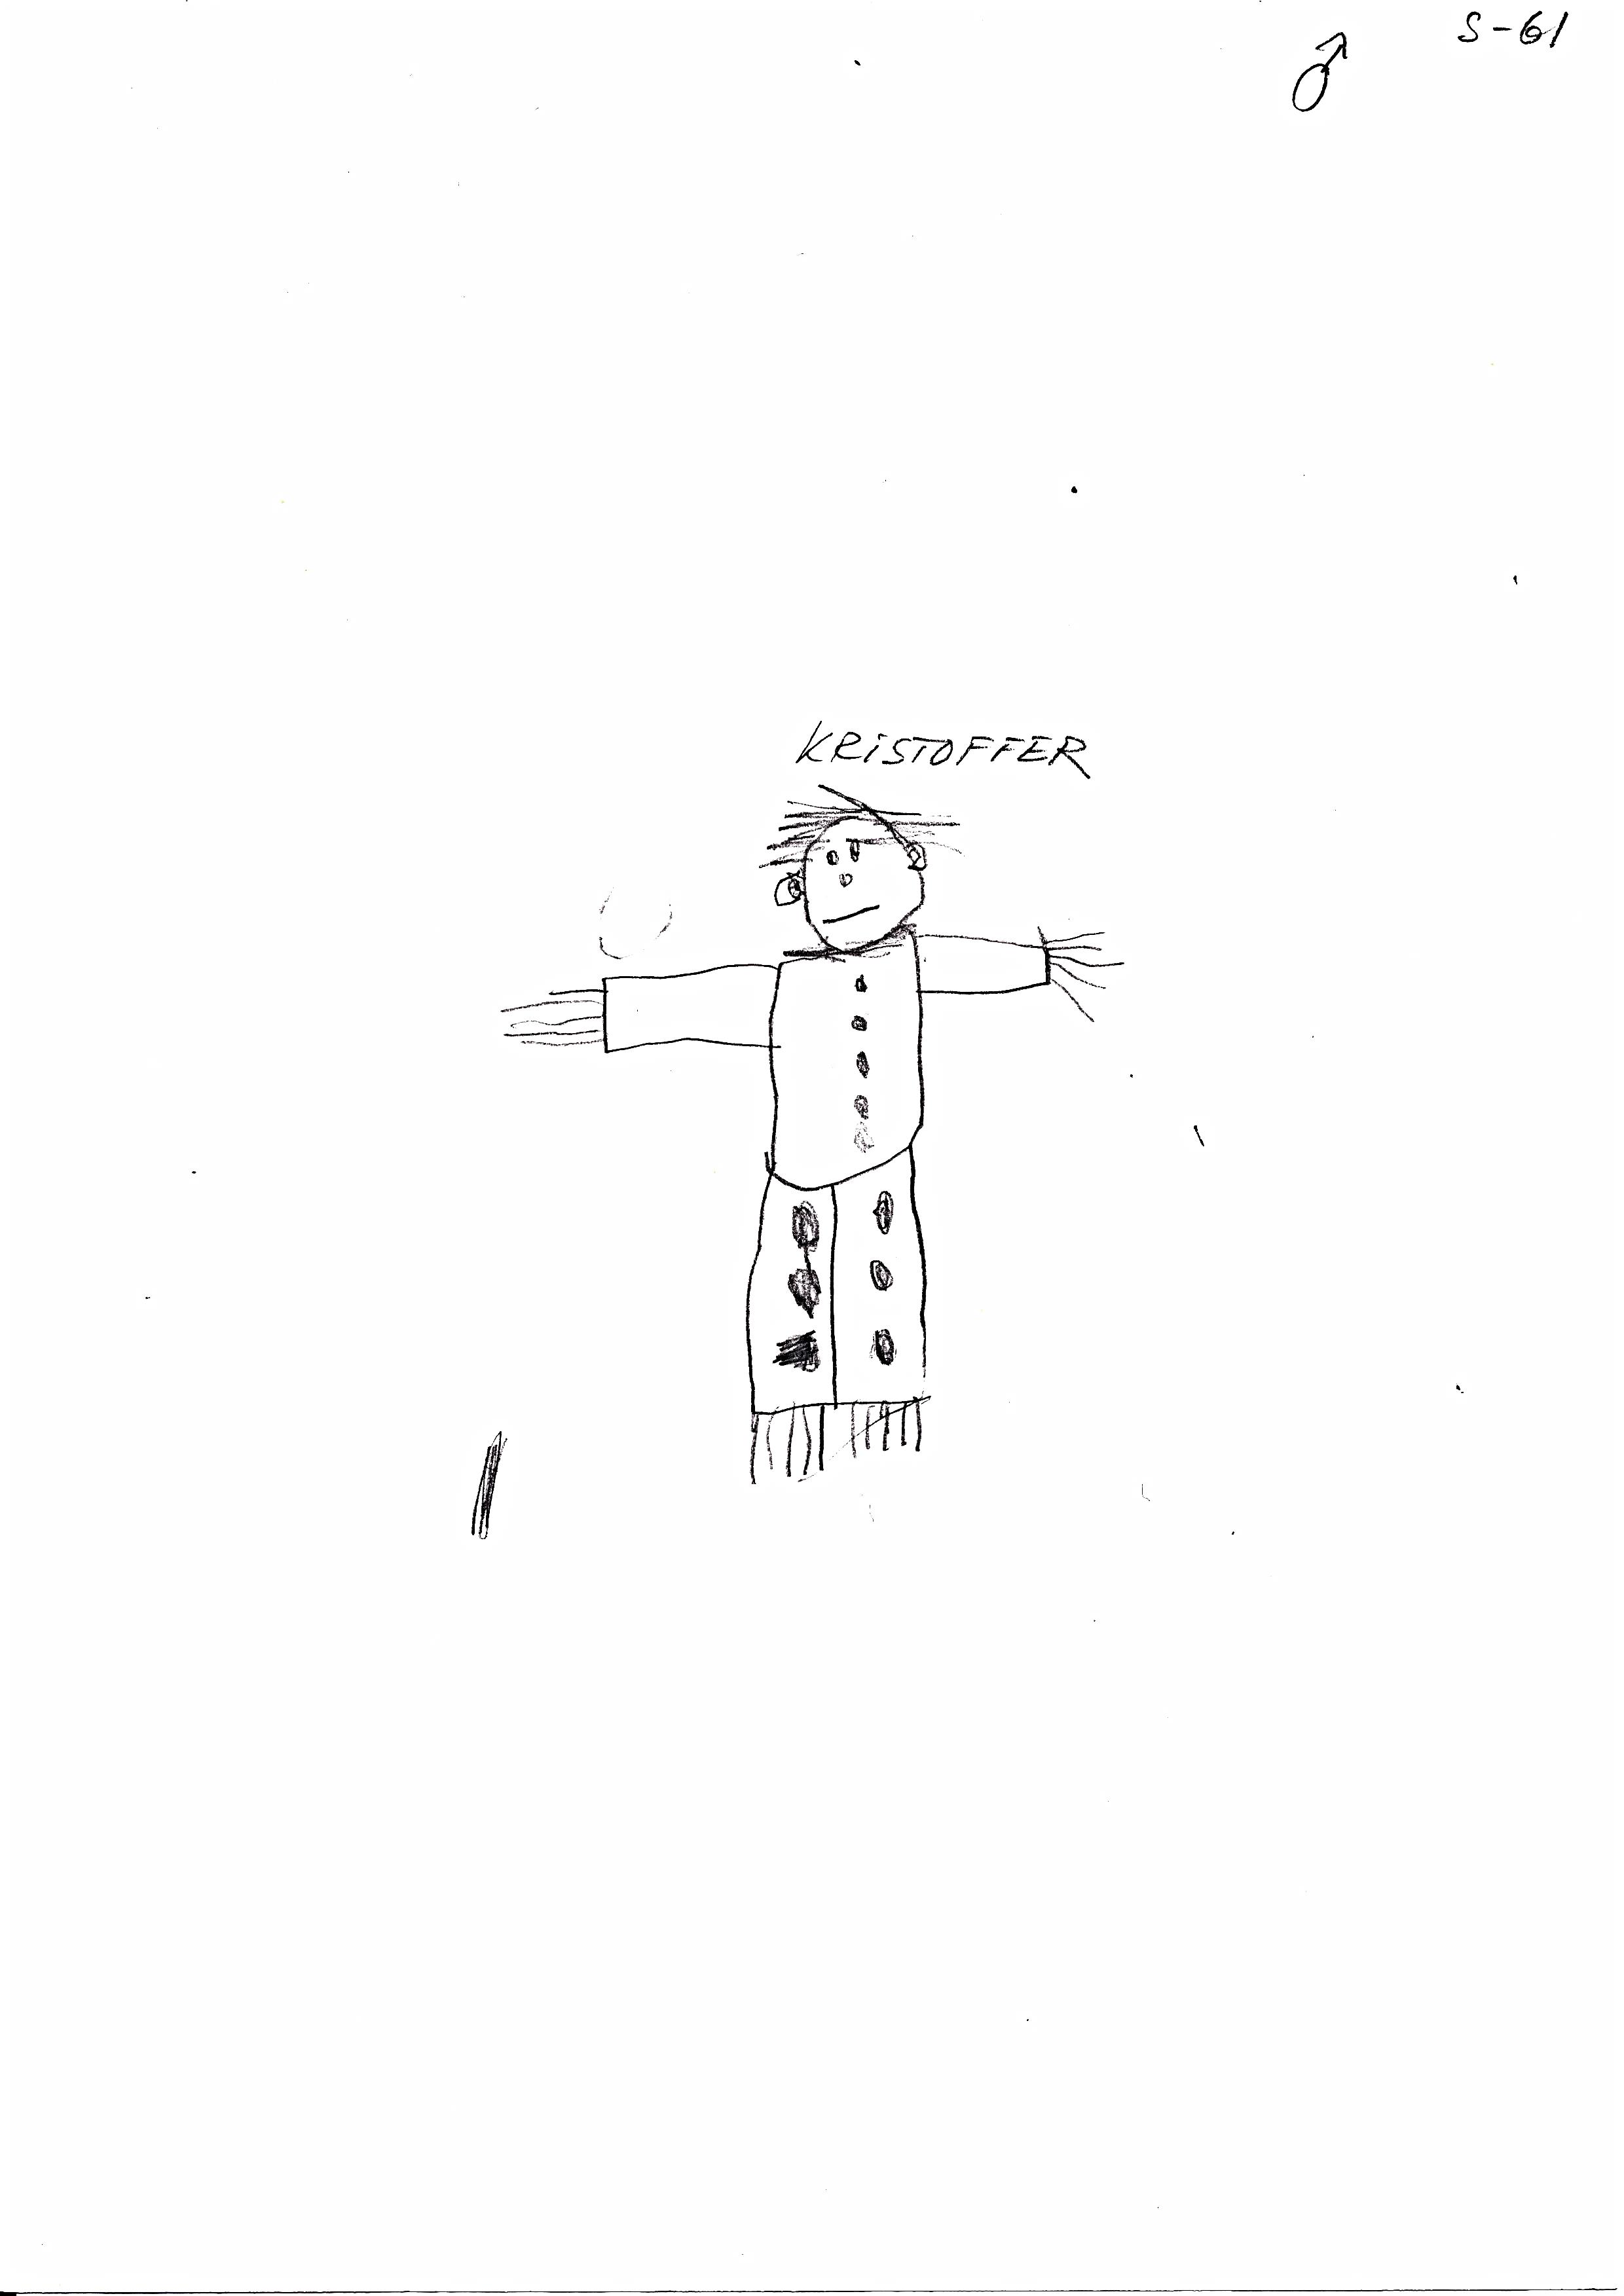 | - Body outline in four parts: head, body, two arms, two separate legs - At least the head and body are two dimensional - Segmented body parts - Arms are protruding from body not head |
| **CONVENTIONAL-II**  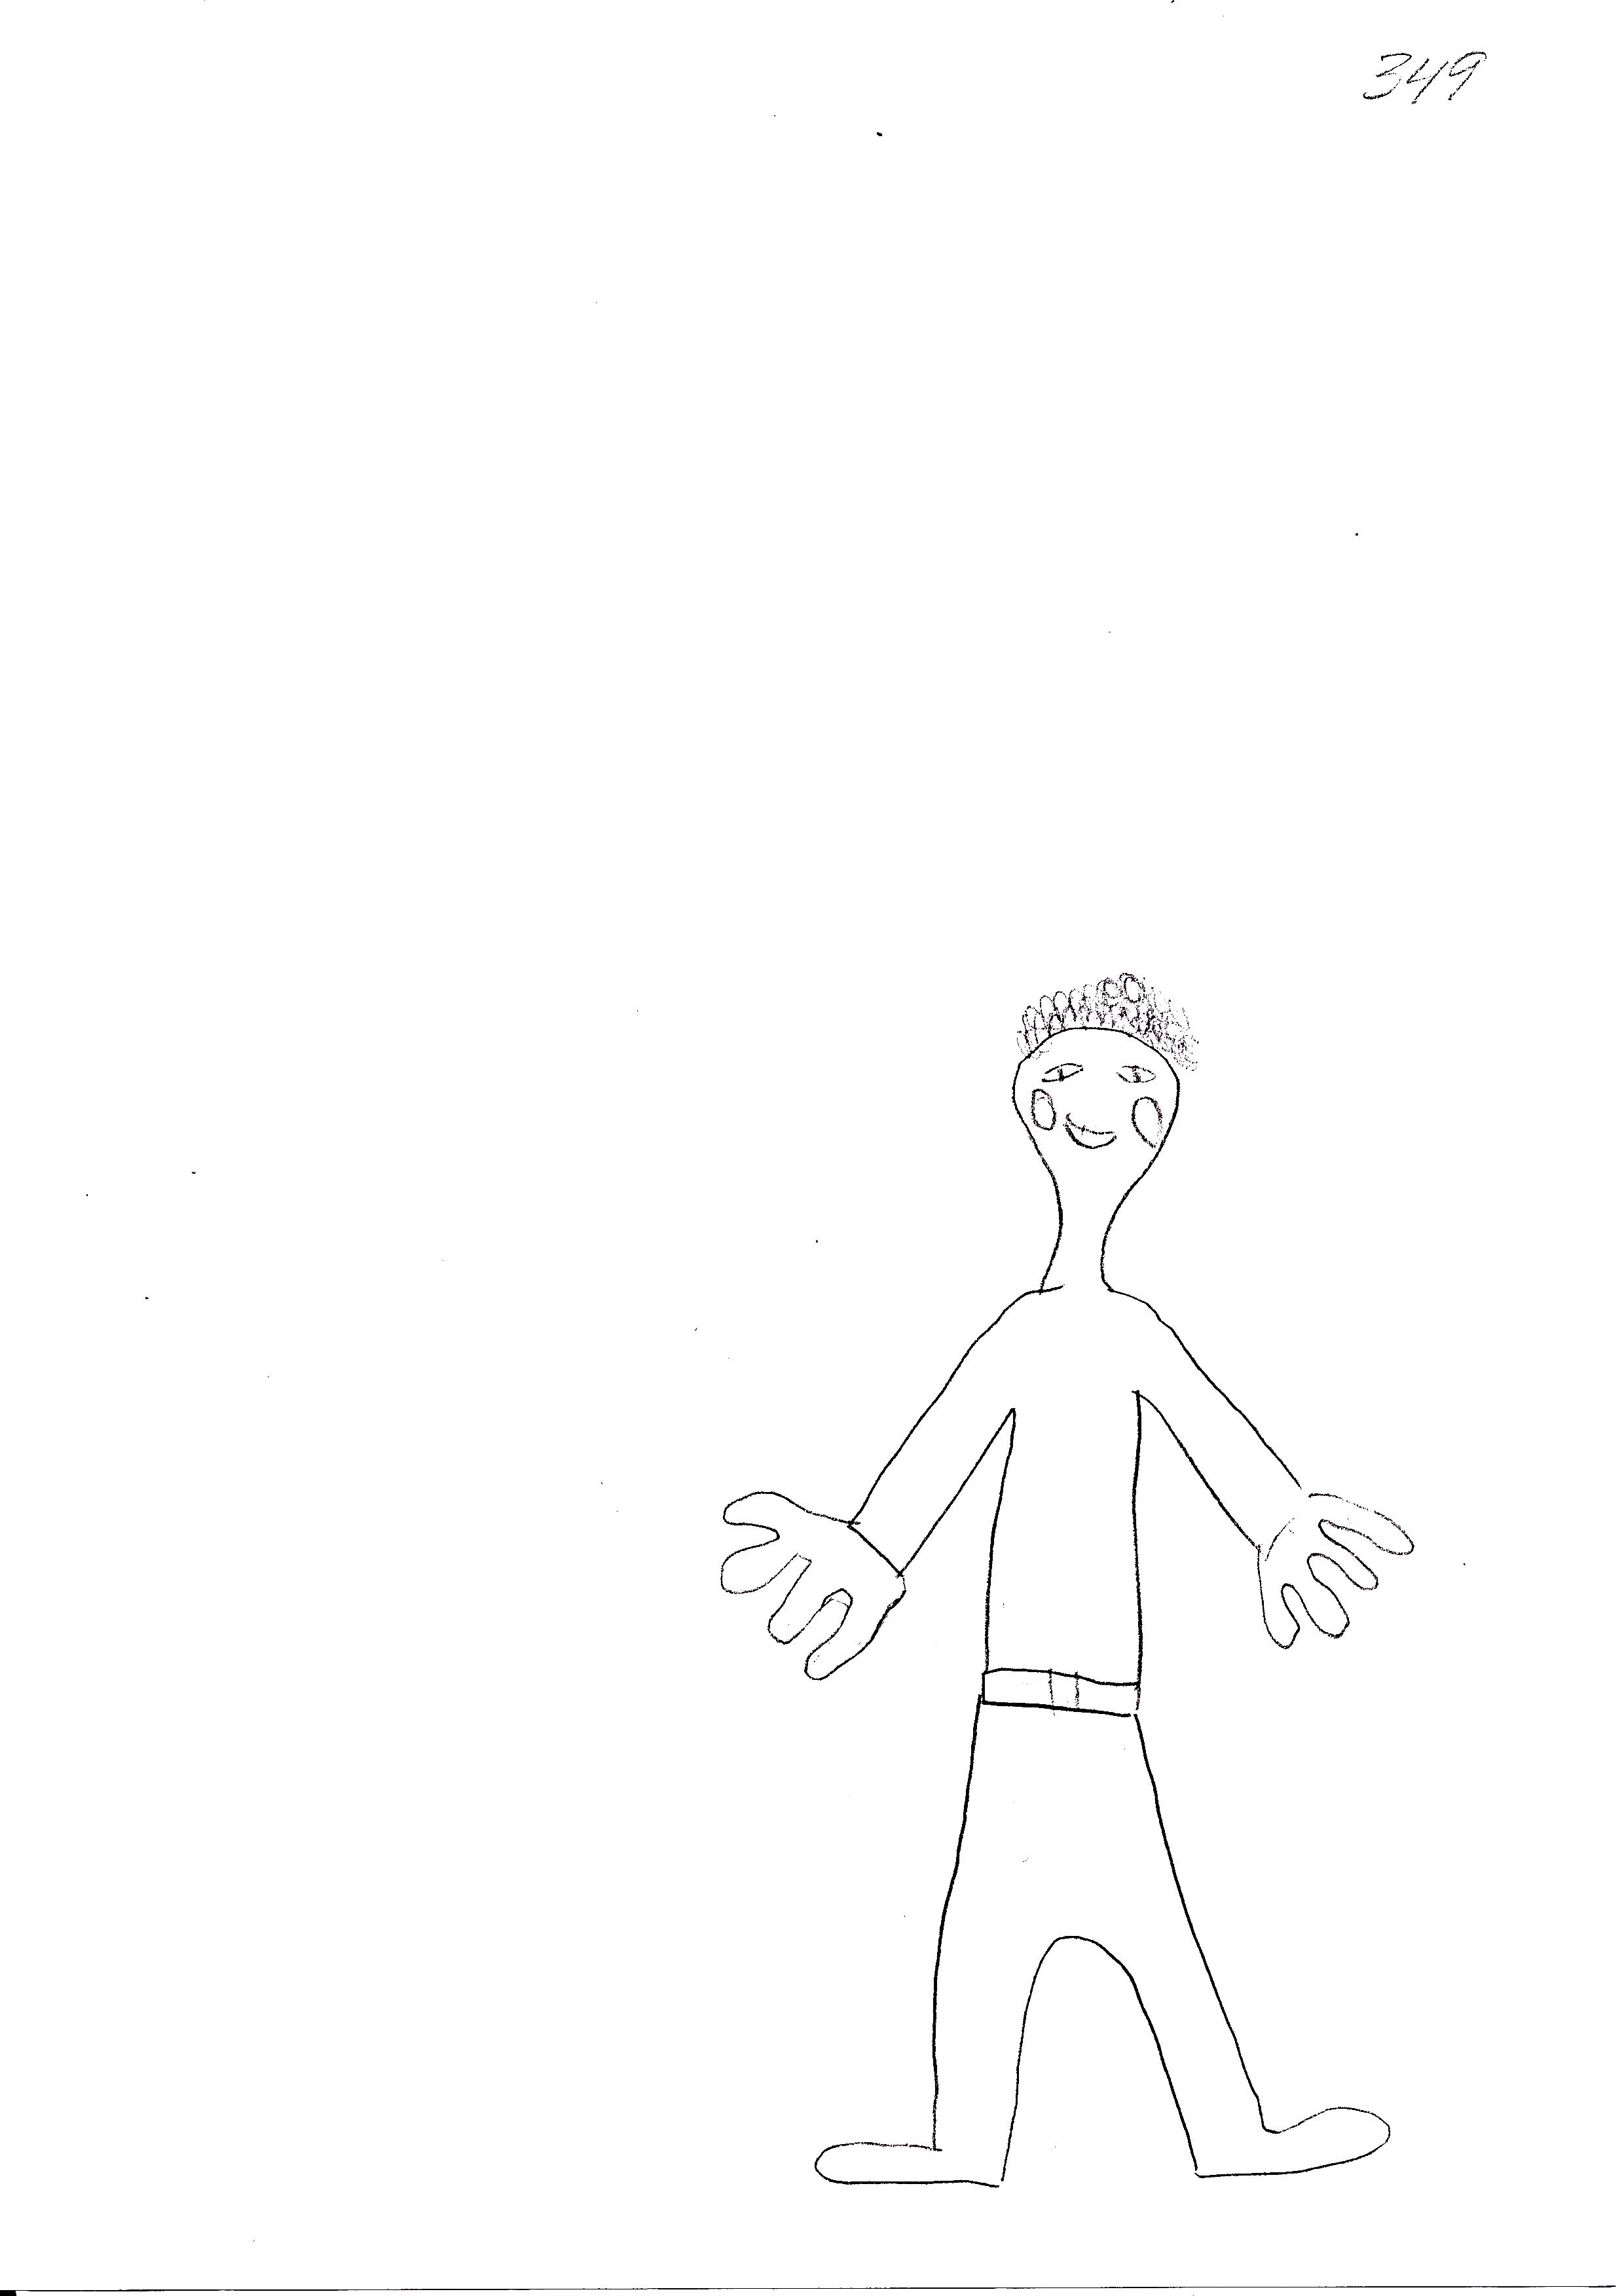 | - Body parts are integrated, continuing on from each other - Two-dimensional arms, legs, neck, head, and body - Fingers and toes can be drawn in stick form - There has to be a face - Includes drawings in profile view |

**Supp. Table 2** HFDs that were randomly selected in terms of gender and gestational group for ImageJ measurements

| **Developmental stage of HFD** | **Pre-term** | | **Control** | | **Total** |
| --- | --- | --- | --- | --- | --- |
| **Girls** | **Boys** | **Girls** | **Boys** |
| Tadpole | 3 | 3 | 2 | 2 | 10 |
| Transitional | 3 | 2 | 2 | 3 | 10 |
| Conventional-I | 4 | 2 | 1 | 3 | 10 |
| Conventional-II***** | 3 | 0 | 6 | 1 | 10 |
| **Total** | 13 | 7 | 11 | 9 | 40 |

***** For this stage, HFDs could not be randomly selected from gestational and gender groups because there was a total of only 10 HFDs in the whole study group.
